# Supplementary material
Source: ML conference proceedings conference paper supplement (https://proceedings.mlr.press/v164/chen22c.html)
Supplement: Supplementary file 1 [file chen22c-supp.zip]

# Supplementary Materials: The Boombox: Visual Reconstruction from Acoustic Vibrations

Anonymous Author(s)

Affiliation

Address

email

## 1 Data Processing Details

2 There are three modalities (RGB, depth, and audio) in our collected data. Our goal for data process-  
3 ing is to obtain high-quality data samples for coherent dynamics and scene representation.

4 For each video recording, we aligned the RGB and depth streams with the camera parameters and  
5 extracted the last frame to represent the final scene after the object became stable. We applied edge-  
6 preserving and hole-filling spatial filters on the depth images to get less noisy depth images. We  
7 then cropped and resized all the image frames to remove the unnecessary backgrounds. In order to  
8 quantitatively evaluate our predictions, we further applied background subtractions leading to binary  
9 object masks.

10 Audio clips were recorded continuously across per data collection trail which included multiple  
11 sequences. Therefore, the first step requires segmenting the audio clips for each dropping sequence.  
12 We first calculate the audio segments for each microphone with energy threshold. As a means to  
13 synchronize among all four microphones, we use the earliest and latest sound arrival timestamps  
14 from four audio segments on the same sequence to finalize the segmentation windows.

## 15 2 Network Architectures

16 We list all the specific parameters of the encoder and decoder network in Table 1 and Table 2. All  
17 layers are accompanied with a batch normalization layer and a specified activation function. We will  
18 also open source all the hardware and software design along with the collected dataset.

| Layer | Kernel Size | #Filters | Stride | Padding | Dilation | Activation |
|-------|-------------|----------|--------|---------|----------|------------|
| Conv1 | 4x4         | 32       | 2      | 1       | 1        | ReLU       |
| Conv2 | 4x4         | 32       | 2      | 1       | 1        | ReLU       |
| Conv3 | 4x4         | 64       | 2      | 1       | 1        | ReLU       |
| Conv4 | 4x4         | 128      | 2      | 1       | 1        | ReLU       |
| Conv5 | 4x4         | 128      | 2      | 1       | 1        | ReLU       |
| Conv6 | 4x4         | 128      | 2      | 1       | 1        | ReLU       |
| Conv7 | 4x4         | 128      | 2      | 1       | 1        | ReLU       |

Table 1: **Encoder Network Parameters:** we list all the specific parameters for the encoder network. In addition to the above convolutional layers, after each “Conv” layer, we attach another convolutional layer with the same number of filters as the current convolutional layer but with  $4 \times 4$  kernel and 3 as stride.

| Layer   | Kernel Size | #Filters | Stride | Padding | Dilation | Activation |
|---------|-------------|----------|--------|---------|----------|------------|
| Deconv7 | 4x4         | 128      | 2      | 1       | 1        | ReLU       |
| Deconv6 | 4x4         | 128      | 2      | 1       | 1        | ReLU       |
| Deconv5 | 4x4         | 128      | 2      | 1       | 1        | ReLU       |
| Deconv4 | 4x4         | 64       | 2      | 1       | 1        | ReLU       |
| Deconv3 | 4x4         | 32       | 2      | 1       | 1        | ReLU       |
| Deconv2 | 4x4         | 16       | 2      | 1       | 1        | ReLU       |
| Deconv1 | 4x4         | 3/1      | 2      | 1       | 1        | Sigmoid    |

Table 2: **Decoder Network Parameters:** we list all the specific parameters for the decoder network. Except for the last layer, along with every transposed convolutional layer, the input of each layer is also first passed through a 2D convolutional layer with kernel size  $3 \times 3$  and stride 1 and then a transposed 2D convolutional layer with kernel size  $3 \times 3$  and stride 2. The output of this branch will then be concatenated with each “Deconv” layer along the feature dimension as the input of the next “Deconv” layer.
